# Supplementary material
Source: PubMed Central journal article supplement (PMC5834677)
Supplement: pnas.1712860115.sd01.pdf [file pnas.1712860115.sd01.pdf]

The apparent half-times ( $t_h$ ) of FRET-labeled AIM2<sup>PYD</sup> polymerization

| [FRET-AIM2 <sup>PYD</sup> ] $\mu\text{M}$ | $t_h$ (min.)      |
|-------------------------------------------|-------------------|
| 0.5                                       | 829.1 $\pm$ 181.9 |
| 1                                         | 197.2 $\pm$ 44.7  |
| 2.5                                       | 125.3 $\pm$ 41.5  |
| 5                                         | 68.7 $\pm$ 11.3   |

The apparent half-times ( $t_h$ ) of FRET-labeled AIM2<sup>PYD</sup> polymerization (2.5  $\mu\text{M}$ ) in the presence of unlabeled AIM2<sup>PYD</sup>.

| [unlabeled AIM2 <sup>PYD</sup> ] $\mu\text{M}$ | $t_h$ (min.)     |
|------------------------------------------------|------------------|
| 0                                              | 125.3 $\pm$ 41.5 |
| 0.25                                           | 107.0 $\pm$ 15.6 |
| 0.5                                            | 78.2 $\pm$ 15.8  |
| 1                                              | 48.4 $\pm$ 9.9   |
| 2.5                                            | 31.2 $\pm$ 3.0   |
| 5                                              | 21.1 $\pm$ 7.1   |

The apparent half-times ( $t_h$ ) of FRET-labeled AIM2<sup>PYD</sup> polymerization (2.5  $\mu\text{M}$ ) in the presence of unlabeled ASC<sup>PYD</sup>.

| [unlabeled ASC <sup>PYD</sup> ] $\mu\text{M}$ | $t_h$ (min.)     |
|-----------------------------------------------|------------------|
| 0                                             | 125.3 $\pm$ 41.5 |
| 0.5                                           | 68.1 $\pm$ 3.2   |
| 1                                             | 50.1 $\pm$ 4.1   |
| 2.5                                           | 27.1 $\pm$ 7.1   |
| 5                                             | 18.5 $\pm$ 6.2   |

The apparent half-times ( $t_h$ ) of FRET-labeled AIM2<sup>PYD</sup> polymerization (2.5  $\mu\text{M}$ ) in the presence of dsDNA-bound AIM2<sup>FL</sup> (36 nM)

| dsDNA size (bps) | $t_h$ (min.)     |
|------------------|------------------|
| No dsDNA         | 125.3 $\pm$ 41.5 |
| 39               | 95.7 $\pm$ 39.9  |
| 60               | 100.7 $\pm$ 37.9 |
| 72               | 74.9 $\pm$ 10.5  |
| 100              | 46.1 $\pm$ 10.0  |
| 150              | 26.8 $\pm$ 9.5   |
| 200              | 22.0 $\pm$ 9.0   |
| 300              | 24.2 $\pm$ 5.6   |
| 600              | 22.0 $\pm$ 3.7   |

The apparent half-times ( $t_h$ ) of FRET-labeled ASC<sup>PYD</sup> polymerization

| [FRET-ASC <sup>PYD</sup> ] $\mu\text{M}$ | $t_h$ (min.)    |
|------------------------------------------|-----------------|
| 1                                        | 66.6 $\pm$ 18.2 |
| 2.5                                      | 25.6 $\pm$ 6.4  |
| 5                                        | 16.4 $\pm$ 4.4  |

The apparent half-times ( $t_h$ ) of FRET-labeled ASC<sup>PYD</sup> polymerization (2.5  $\mu\text{M}$ ) in the presence of unlabeled ASC<sup>PYD</sup>.

| [unlabeled ASC <sup>PYD</sup> ] $\mu\text{M}$ | $t_h$ (min.)   |
|-----------------------------------------------|----------------|
| 0                                             | 25.6 $\pm$ 6.4 |
| 0.5                                           | 23.1 $\pm$ 6.4 |
| 1                                             | 19.2 $\pm$ 2.5 |
| 2.5                                           | 12.2 $\pm$ 1.8 |
| 5                                             | 7.9 $\pm$ 1.7  |

The apparent half-times ( $t_h$ ) of FRET-labeled ASC<sup>PYD</sup> polymerization (2.5  $\mu\text{M}$ ) in the presence of unlabeled AIM2<sup>PYD</sup>.

| [unlabeled AIM2 <sup>PYD</sup> ] $\mu\text{M}$ | $t_h$ (min.)   |
|------------------------------------------------|----------------|
| 0                                              | 25.6 $\pm$ 6.4 |
| 0.125                                          | 28.3 $\pm$ 1.8 |
| 0.25                                           | 26.4 $\pm$ 5.6 |
| 0.5                                            | 23.2 $\pm$ 6.8 |
| 1                                              | 17.4 $\pm$ 4.6 |
| 2.5                                            | 13.7 $\pm$ 3.3 |

The apparent half-times ( $t_h$ ) of FRET-labeled ASC<sup>PYD</sup> polymerization (2.5  $\mu\text{M}$ ) in the presence of dsDNA-bound AIM2<sup>FL</sup> (36 nM)

| dsDNA size (bps) | $t_h$ (min.)   |
|------------------|----------------|
| No dsDNA         | 25.6 $\pm$ 6.4 |
| 39               | 23.3 $\pm$ 3.7 |
| 60               | 21.2 $\pm$ 2.8 |
| 72               | 19.7 $\pm$ 3.5 |
| 100              | 17.9 $\pm$ 1.1 |
| 150              | 11.9 $\pm$ 2.7 |
| 200              | 10.0 $\pm$ 1.8 |
| 300              | 10.6 $\pm$ 2.8 |
| 600              | 9.6 $\pm$ 1.8  |

The observed assembly rate ( $k_{assm}$ ) of AIM2<sup>FL</sup> (72 nM) on various size of dsDNA

| dsDNA size (bps) | $k_{assm}(min^{-1})$ | $t_h$ (min.)    |
|------------------|----------------------|-----------------|
| 24               | 0.001*               | 690*            |
| 39               | $0.016 \pm 0.008$    | 43.13           |
| 72               | $0.110 \pm 0.007$    | $6.27 \pm 0.40$ |
| 150              | $0.230 \pm 0.049$    | $3.00 \pm 0.65$ |
| 300              | $0.440 \pm 0.212$    | $1.57 \pm 0.76$ |
| 600              | $0.660 \pm 0.139$    | $1.05 \pm 0.22$ |

\*Upper estimate

The observed assembly rates ( $k_{assm}$ ) of AIM2<sup>FL</sup> (72 nM) on various size of dsDNA in the presence of 5  $\mu$ M AIM2<sup>PYD</sup>

| dsDNA size (bps) | $k_{assm}(min^{-1})$ | $t_h$ (min.)     |
|------------------|----------------------|------------------|
| 24               | $0.033 \pm 0.014$    | $20.91 \pm 8.87$ |
| 39               | $0.157 \pm 0.042$    | $4.39 \pm 1.18$  |
| 72               | $0.520 \pm 0.130$    | $1.33 \pm 0.33$  |
| 150              | $1.470 \pm 0.300$    | $0.47 \pm 0.10$  |
| 300              | $1.760 \pm 0.330$    | $0.39 \pm 0.07$  |
| 600              | $1.920 \pm 0.210$    | $0.36 \pm 0.04$  |

The observed assembly rates ( $k_{assm}$ ) of AIM2<sup>FL</sup> (72 nM) on various size of dsDNA in the presence of 5  $\mu$ M ASC<sup>PYD</sup>

| dsDNA size (bps) | $k_{assm}(min^{-1})$ | $t_h$ (min.)    |
|------------------|----------------------|-----------------|
| 24               | 0.006*               | 115*            |
| 39               | $0.089 \pm 0.012$    | $7.75 \pm 1.05$ |
| 72               | $0.250 \pm 0.081$    | $2.76 \pm 0.89$ |
| 150              | $0.410 \pm 0.075$    | $1.68 \pm 0.31$ |
| 300              | $0.730 \pm 0.087$    | $0.95 \pm 0.11$ |
| 600              | $0.825 \pm 0.131$    | $0.84 \pm 0.13$ |

\*Upper estimate

Rate constants used in modeling

| Rate constants | ( $\text{min}^{-1}$ )                     |
|----------------|-------------------------------------------|
| $k_1$          | $0.00096 \mu\text{M}^{-1}\text{min}^{-1}$ |
| $k_2$          | $0.001845 \text{min}^{-1}$                |
| $k_3$          | $0.00738 \mu\text{M}^{-1}\text{min}^{-1}$ |
| $k_4$          | $180 \mu\text{M}^{-1}\text{min}^{-1}$     |
| $k_5$          | $0.00006 \text{min}^{-1}$                 |
| $k_6$          | $9.24 \mu\text{M}^{-1}\text{min}^{-1}$    |
| $k_7$          | $0.00732 \mu\text{M}^{-1}\text{min}^{-1}$ |
| $k_8$          | $0.0066 \text{min}^{-1}$                  |
| $k_9$          | $0.0132 \mu\text{M}^{-1}\text{min}^{-1}$  |
| $k_{10}$       | $0.0066 \mu\text{M}^{-1}\text{min}^{-1}$  |
| $k_{11}$       | $0.01812 \mu\text{M}^{-1}\text{min}^{-1}$ |

Values for *AIM2dsDNA*

| dsDNA size (bps) | <i>AIM2dsDNA</i> |
|------------------|------------------|
| 24               | N/A              |
| 39               | 0.0242           |
| 72               | 0.1667           |
| 150              | 0.3484           |
| 300              | 0.6667           |
| 600              | 1                |

Values for *ringBind1*

| dsDNA size (bps) | <i>ringBind</i> |
|------------------|-----------------|
| 24               | N/A             |
| 39               | 5.9             |
| 72               | 12.9            |
| 150              | 70.4            |
| 300              | 80.1            |
| 600              | 90              |

Values for *ringBind2*

| dsDNA size (bps) | <i>ringBind</i> |
|------------------|-----------------|
| 24               | N/A             |
| 39               | 4.0             |
| 72               | 12.9            |
| 150              | 47.9            |
| 300              | 58.9            |
| 600              | 67              |

Values for *ASCdnaAIM2*

| dsDNA size (bps) | <i>ASCdnaAIM2</i> |
|------------------|-------------------|
| 24               | N/A               |
| 39               | 0.00398           |
| 72               | 0.00764           |
| 150              | 0.00982           |
| 300              | 0.01583           |
| 600              | 0.00898           |

Values for *AIM2<sup>p</sup>dnaAIM2*

| dsDNA size (bps) | <i>AIM2<sup>p</sup>dnaAIM2</i> |
|------------------|--------------------------------|
| 24               | N/A                            |
| 39               | 0.0068                         |
| 72               | 0.0199                         |
| 150              | 0.0601                         |
| 300              | 0.0641                         |
| 600              | 0.0611                         |
